# Supplementary material for: Exploring the Root Morphological Traits of Diverse-Origin Cultivated Soybean
Source: MDPI journal article supplement (doi:10.3390/agronomy13102666), 2023-10-23
Supplement: s1 [file s1]

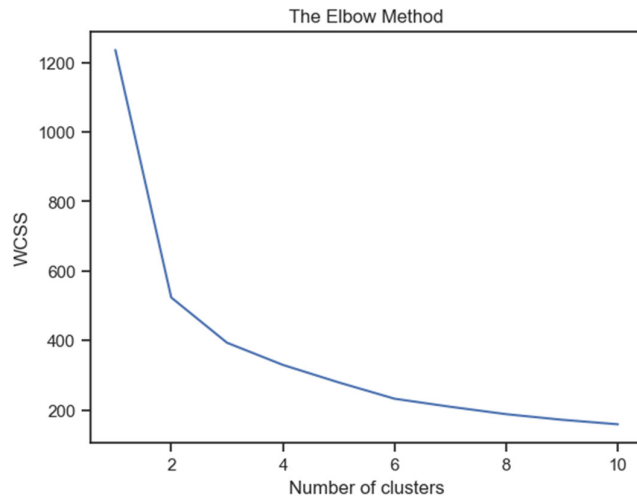

**Figure S1:** An elbow method graph represents an optimal number of clusters following the Within-Cluster Sum of Square Method (WCSS).

**Table S1.** Accessions studied in our experiment, along with their origins.

| S.N | IT Number | Origin | S.N | IT Number | Origin | S.N | IT Number | Origin |
|-----|-----------|--------|-----|-----------|--------|-----|-----------|--------|
| 1   | IT21631   | KOR    | 73  | IT101256  | KOR    | 145 | IT153915  | KOR    |
| 2   | IT21649   | HKG    | 74  | IT103322  | KOR    | 146 | IT153920  | KOR    |
| 3   | IT21665   | CHN    | 75  | IT103548  | KOR    | 147 | IT154209  | KOR    |
| 4   | IT21686   | USA    | 76  | IT103631  | KOR    | 148 | IT154365  | KOR    |
| 5   | IT21697   | KOR    | 77  | IT103951  | KOR    | 149 | IT154391  | KOR    |
| 6   | IT21874   | KOR    | 78  | IT104441  | KOR    | 150 | IT154397  | KOR    |
| 7   | IT21882   | KOR    | 79  | IT104789  | KOR    | 151 | IT154413  | KOR    |
| 8   | IT21941   | KOR    | 80  | IT104865  | KOR    | 152 | IT154489  | KOR    |
| 9   | IT22074   | UNK    | 81  | IT104874  | KOR    | 153 | IT154613  | KOR    |
| 10  | IT22099   | KOR    | 82  | IT104935  | KOR    | 154 | IT154621  | KOR    |
| 11  | IT22156   | CHN    | 83  | IT104938  | KOR    | 155 | IT154718  | KOR    |
| 12  | IT22194   | USA    | 84  | IT104997  | KOR    | 156 | IT154724  | KOR    |
| 13  | IT22240   | JPN    | 85  | IT105286  | KOR    | 157 | IT154725  | KOR    |
| 14  | IT22249   | CRI    | 86  | IT105400  | KOR    | 158 | IT154757  | KOR    |
| 15  | IT22268   | JPN    | 87  | IT105782  | KOR    | 159 | IT155149  | KOR    |
| 16  | IT22274   | KOR    | 88  | IT108727  | KOR    | 160 | IT155159  | KOR    |
| 17  | IT22456   | KOR    | 89  | IT108806  | KOR    | 161 | IT155946  | KOR    |
| 18  | IT22582   | KOR    | 90  | IT108929  | KOR    | 162 | IT156011  | JPN    |
| 19  | IT22590   | KOR    | 91  | IT111048  | KOR    | 163 | IT156012  | BRA    |
| 20  | IT22891   | UNK    | 92  | IT112739  | THA    | 164 | IT156023  | THA    |
| 21  | IT22990   | UNK    | 93  | IT112847  | KOR    | 165 | IT156106  | CHN    |
| 22  | IT23002   | DEU    | 94  | IT113059  | KOR    | 166 | IT156133  | KOR    |

|    |         |     |     |          |     |     |          |     |
|----|---------|-----|-----|----------|-----|-----|----------|-----|
| 23 | IT23005 | DNK | 95  | IT113581 | KOR | 167 | IT156143 | KOR |
| 24 | IT23015 | JPN | 96  | IT115409 | KOR | 168 | IT156159 | KOR |
| 25 | IT23016 | AFG | 97  | IT115476 | KOR | 169 | IT156165 | KOR |
| 26 | IT23027 | SVN | 98  | IT115491 | KOR | 170 | IT156180 | KOR |
| 27 | IT23028 | SVN | 99  | IT115500 | KOR | 171 | IT156181 | KOR |
| 28 | IT23071 | SRB | 100 | IT115505 | KOR | 172 | IT156189 | KOR |
| 29 | IT23220 | UNK | 101 | IT115605 | KOR | 173 | IT156190 | KOR |
| 30 | IT23223 | UNK | 102 | IT115679 | KOR | 174 | IT156195 | KOR |
| 31 | IT23236 | CHN | 103 | IT115713 | KOR | 175 | IT156242 | JPN |
| 32 | IT23240 | ITA | 104 | IT115849 | KOR | 176 | IT156253 | KOR |
| 33 | IT23289 | JPN | 105 | IT115861 | KOR | 177 | IT156262 | KOR |
| 34 | IT23389 | KOR | 106 | IT115907 | KOR | 178 | IT156263 | USA |
| 35 | IT23453 | KOR | 107 | IT115920 | KOR | 179 | IT156278 | BTN |
| 36 | IT23479 | VEN | 108 | IT134349 | KOR | 180 | IT156280 | USA |
| 37 | IT23482 | KOR | 109 | IT134351 | KOR | 181 | IT157861 | KOR |
| 38 | IT23489 | ARG | 110 | IT134415 | KOR | 182 | IT157951 | KOR |
| 39 | IT23504 | COL | 111 | IT136303 | NPL | 183 | IT157957 | MYS |
| 40 | IT23530 | USA | 112 | IT138089 | KOR | 184 | IT157958 | LKA |
| 41 | IT23541 | USA | 113 | IT141627 | KOR | 185 | IT157970 | UNK |
| 42 | IT23589 | UNK | 114 | IT141697 | KOR | 186 | IT158004 | BEL |
| 43 | IT23602 | ZAF | 115 | IT141790 | KOR | 187 | IT158006 | BEL |
| 44 | IT23648 | USA | 116 | IT141801 | KOR | 188 | IT158040 | DEU |
| 45 | IT23739 | USA | 117 | IT141865 | KOR | 189 | IT158049 | SWE |
| 46 | IT23768 | USA | 118 | IT141890 | KOR | 190 | IT158063 | ZAF |
| 47 | IT23803 | KOR | 119 | IT141970 | KOR | 191 | IT158073 | SRB |
| 48 | IT23848 | KOR | 120 | IT141972 | KOR | 192 | IT158076 | YUG |
| 49 | IT23891 | KOR | 121 | IT142063 | KOR | 193 | IT158095 | MEX |
| 50 | IT23924 | KOR | 122 | IT142807 | KOR | 194 | IT158099 | ZWE |
| 51 | IT23948 | KOR | 123 | IT142810 | KOR | 195 | IT160024 | USA |
| 52 | IT23955 | KOR | 124 | IT143006 | KOR | 196 | IT160105 | KOR |
| 53 | IT23974 | KOR | 125 | IT143039 | KOR | 197 | IT160143 | KOR |
| 54 | IT24147 | KOR | 126 | IT143161 | KOR | 198 | IT160160 | USA |
| 55 | IT24151 | KOR | 127 | IT143169 | KOR | 199 | IT160295 | USA |
| 56 | IT24186 | USA | 128 | IT143192 | JPN | 200 | IT160936 | ZAF |
| 57 | IT24212 | KOR | 129 | IT143277 | PHL | 201 | IT161015 | USA |
| 58 | IT24250 | TWN | 130 | IT143347 | KOR | 202 | IT161371 | CAN |
| 59 | IT24271 | UNK | 131 | IT144019 | KOR | 203 | IT161377 | CHN |
| 60 | IT24280 | GEO | 132 | IT146110 | TWN | 204 | IT161384 | CHN |
| 61 | IT24285 | UKR | 133 | IT151154 | JPN | 205 | IT161435 | CHN |
| 62 | IT24300 | CHN | 134 | IT151161 | CHN | 206 | IT161443 | AUS |

|    |          |     |     |          |     |     |          |     |
|----|----------|-----|-----|----------|-----|-----|----------|-----|
| 63 | IT24453  | KOR | 135 | IT151169 | PER | 207 | IT161461 | CHN |
| 64 | IT24570  | KOR | 136 | IT153356 | KOR | 208 | IT161474 | UNK |
| 65 | IT24634  | KOR | 137 | IT153358 | KOR | 209 | IT161990 | KOR |
| 66 | IT24681  | USA | 138 | IT153640 | KOR | 210 | IT24099  | KOR |
| 67 | IT24789  | KOR | 139 | IT153649 | KOR | 211 | IT23319  | CHN |
| 68 | IT25044  | UNK | 140 | IT153722 | KOR | 212 | IT142811 | KOR |
| 69 | IT25152  | KOR | 141 | IT153820 | KOR | 213 | IT142818 | KOR |
| 70 | IT25384  | KOR | 142 | IT153834 | KOR | 214 | IT142834 | KOR |
| 71 | IT25668  | KOR | 143 | IT153844 | KOR | 215 | IT142837 | CAN |
| 72 | IT101015 | KOR | 144 | IT153901 | KOR | 216 | PUNGSAN  | KOR |

**Table S2.** A detail result of the clustering analysis

**I.** Evolution of the inertia:

| Inertia\Cluster  | 3             | 4             | 5             |
|------------------|---------------|---------------|---------------|
| Within-cluster   | 32107466.499  | 29364858.788  | 18634909.203  |
| Between-clusters | 123672794.144 | 126415401.856 | 137145351.441 |
| Total inertia    | 155780260.644 | 155780260.644 | 155780260.644 |

**II.** Statistics for each iteration:

| Iteration | Within-cluster variance | Trace(W)  | ln(Determinant(W)) | Wilks' Lambda |
|-----------|-------------------------|-----------|--------------------|---------------|
| 0         | 7.151E+05               | 1.523E+08 | 7.604E+01          | 9.190E-01     |
| 1         | 2.192E+05               | 4.668E+07 | 7.459E+01          | 2.154E-01     |
| 2         | 1.605E+05               | 3.420E+07 | 7.427E+01          | 1.561E-01     |
| 3         | 1.528E+05               | 3.254E+07 | 7.422E+01          | 1.482E-01     |
| 4         | 1.514E+05               | 3.225E+07 | 7.421E+01          | 1.474E-01     |
| 5         | 1.508E+05               | 3.213E+07 | 7.420E+01          | 1.465E-01     |
| 6         | 1.507E+05               | 3.211E+07 | 7.420E+01          | 1.466E-01     |

**III.** Initial cluster centroids:

| Cluster | TRL     | AD     | RV    | NT       | NF       | TTL     |
|---------|---------|--------|-------|----------|----------|---------|
| 1       | 930.213 | 0.457  | 1.470 | 1174.910 | 2598.777 | 681.923 |
| 2       | 842.613 | 0.462  | 1.343 | 1074.167 | 2364.398 | 633.765 |
| 3       | 915.894 | 11.006 | 1.433 | 1169.550 | 2594.070 | 699.122 |

**IV.** Cluster centroids:

| Cluster | TRL      | AD     | RV    | NT       | NF       | TTL     | Sum of weights | Within-cluster variance |
|---------|----------|--------|-------|----------|----------|---------|----------------|-------------------------|
| 1       | 650.786  | 12.249 | 1.139 | 824.249  | 1676.298 | 485.032 | 69.000         | 156784.183              |
| 2       | 920.735  | 0.460  | 1.478 | 1149.229 | 2557.514 | 691.361 | 83.000         | 116829.903              |
| 3       | 1132.091 | 0.437  | 1.636 | 1471.208 | 3388.484 | 850.729 | 64.000         | 188350.635              |

V. Distances between the cluster centroids:

| Cluster | TRL      | AD     | RV    | NT       | NF       | TTL     | Sum of weights | Within-cluster variance |
|---------|----------|--------|-------|----------|----------|---------|----------------|-------------------------|
| 1       | 650.786  | 12.249 | 1.139 | 824.249  | 1676.298 | 485.032 | 69.000         | 156784.183              |
| 2       | 920.735  | 0.460  | 1.478 | 1149.229 | 2557.514 | 691.361 | 83.000         | 116829.903              |
| 3       | 1132.091 | 0.437  | 1.636 | 1471.208 | 3388.484 | 850.729 | 64.000         | 188350.635              |

VI. Central objects:

| Cluster  | TRL      | AD    | RV    | NT       | NF       | TTL     |
|----------|----------|-------|-------|----------|----------|---------|
| 1        |          |       |       |          |          |         |
| (Obs164) | 644.749  | 0.467 | 1.048 | 827.833  | 1693.167 | 496.683 |
| 2        |          |       |       |          |          |         |
| (Obs146) | 946.664  | 0.482 | 1.522 | 1235.750 | 2584.167 | 715.491 |
| 3        |          |       |       |          |          |         |
| (Obs114) | 1092.797 | 0.434 | 1.502 | 1469.500 | 3449.667 | 897.859 |

VII. Distances between the central objects:

|            | 1 (Obs164) | 2 (Obs146) | 3 (Obs114) |
|------------|------------|------------|------------|
| 1 (Obs164) | 0          | 1048.478   | 1964.362   |
| 2 (Obs146) | 1048.478   | 0          | 926.468    |
| 3 (Obs114) | 1964.362   | 926.468    | 0          |

Table S3. K-means clustering result

| Cluster                      | 1          | 2          | 3          |
|------------------------------|------------|------------|------------|
| Number of objects by cluster | 77         | 69         | 70         |
| Sum of weights               | 77         | 69         | 70         |
| Within-cluster variance      | 156784.183 | 116829.903 | 188350.635 |
| Minimum distance to centroid | 24.666     | 97.215     | 86.669     |
| Average distance to centroid | 317.801    | 321.816    | 366.784    |
| Maximum distance to centroid | 1644.081   | 560.525    | 1381.812   |
|                              | Obs1       | Obs5       | Obs7       |
|                              | Obs2       | Obs8       | Obs11      |
|                              | Obs3       | Obs10      | Obs13      |
|                              | Obs4       | Obs12      | Obs14      |
|                              | Obs6       | Obs15      | Obs26      |

|        |        |        |
|--------|--------|--------|
| Obs9   | Obs23  | Obs27  |
| Obs16  | Obs24  | Obs34  |
| Obs17  | Obs25  | Obs35  |
| Obs18  | Obs28  | Obs36  |
| Obs19  | Obs29  | Obs42  |
| Obs20  | Obs30  | Obs47  |
| Obs21  | Obs31  | Obs48  |
| Obs22  | Obs33  | Obs51  |
| Obs32  | Obs37  | Obs52  |
| Obs38  | Obs39  | Obs54  |
| Obs41  | Obs40  | Obs62  |
| Obs43  | Obs44  | Obs63  |
| Obs46  | Obs45  | Obs65  |
| Obs49  | Obs50  | Obs66  |
| Obs71  | Obs53  | Obs68  |
| Obs77  | Obs55  | Obs69  |
| Obs86  | Obs56  | Obs70  |
| Obs89  | Obs57  | Obs72  |
| Obs94  | Obs58  | Obs73  |
| Obs96  | Obs59  | Obs75  |
| Obs97  | Obs60  | Obs76  |
| Obs106 | Obs61  | Obs79  |
| Obs115 | Obs64  | Obs80  |
| Obs119 | Obs67  | Obs82  |
| Obs123 | Obs74  | Obs90  |
| Obs126 | Obs78  | Obs98  |
| Obs132 | Obs81  | Obs102 |
| Obs139 | Obs83  | Obs109 |
| Obs141 | Obs84  | Obs110 |
| Obs143 | Obs85  | Obs111 |
| Obs159 | Obs87  | Obs112 |
| Obs160 | Obs88  | Obs113 |
| Obs161 | Obs91  | Obs114 |
| Obs164 | Obs92  | Obs117 |
| Obs166 | Obs93  | Obs122 |
| Obs168 | Obs95  | Obs127 |
| Obs170 | Obs99  | Obs128 |
| Obs172 | Obs100 | Obs130 |
| Obs173 | Obs101 | Obs131 |
| Obs174 | Obs103 | Obs133 |
| Obs175 | Obs104 | Obs136 |

|        |        |        |
|--------|--------|--------|
| Obs176 | Obs105 | Obs140 |
| Obs177 | Obs107 | Obs142 |
| Obs178 | Obs108 | Obs144 |
| Obs179 | Obs116 | Obs149 |
| Obs180 | Obs118 | Obs150 |
| Obs181 | Obs120 | Obs153 |
| Obs182 | Obs121 | Obs154 |
| Obs184 | Obs124 | Obs155 |
| Obs186 | Obs125 | Obs156 |
| Obs187 | Obs129 | Obs157 |
| Obs188 | Obs134 | Obs163 |
| Obs189 | Obs135 | Obs165 |
| Obs190 | Obs137 | Obs196 |
| Obs191 | Obs138 | Obs200 |
| Obs192 | Obs145 | Obs205 |
| Obs193 | Obs146 | Obs206 |
| Obs194 | Obs147 | Obs212 |
| Obs198 | Obs148 | Obs214 |
| Obs208 | Obs151 | Obs169 |
| Obs209 | Obs152 | Obs171 |
| Obs210 | Obs158 | Obs183 |
| Obs215 | Obs162 | Obs185 |
| Obs216 | Obs167 | Obs195 |
| Obs199 |        | Obs197 |
| Obs201 |        |        |
| Obs202 |        |        |
| Obs203 |        |        |
| Obs204 |        |        |
| Obs207 |        |        |
| Obs211 |        |        |
| Obs213 |        |        |

---
